# Supplementary material for: Exploration of Novel Inhibitors for Class I Histone Deacetylase Isoforms by QSAR Modeling and Molecular Dynamics Simulation Assays
Source: PubMed Central journal article supplement (PMC4592208; doi:10.1371/journal.pone.0139588), 2015-10-02
Supplement: pone.0139588.s001.pdf [file pone.0139588.s001.pdf]

**Exploration of Novel Inhibitors for Class I Histone Deacetylase Isoforms by QSAR Modeling and Molecular Dynamics Simulation Assays**

**Zainab Noor, Noreen Afzal, Sajid Rashid\***

**Quaid-i-Azam University, Islamabad**

**\*Email: sajidrwp@yahoo.co.uk**

**Supplementary Material**

**Table A** PDB ids of class I HDAC target proteins

| <b>Protein Name</b> | <b>PDB id</b> | <b>Resolutions</b> | <b>Date</b> |
|---------------------|---------------|--------------------|-------------|
| <b>HDAC1</b>        | 4BKX          | 3.00 Å             | 2013        |
| <b>HDAC2</b>        | 4LXZ          | 1.85 Å             | 2013        |
| <b>HDAC3</b>        | 4A69          | 2.06 Å             | 2012        |
| <b>HDAC8</b>        | 1T64          | 1.90 Å             | 2004        |

**Table B** IC<sub>50</sub> values of 16 known class I HDAC inhibitors

| <b>Sr. No.</b> | <b>Compounds</b> | <b>IC<sub>50</sub> values (nM)</b> |              |              |              |
|----------------|------------------|------------------------------------|--------------|--------------|--------------|
|                |                  | <b>HDAC1</b>                       | <b>HDAC2</b> | <b>HDAC3</b> | <b>HDAC8</b> |
| <b>1.</b>      | MS-275           | 120                                | 250          | 120          | >1000        |
| <b>2.</b>      | CI-994           | 900                                | 900          | 1200         | >2000        |
| <b>3.</b>      | LAQ-824          | 3.23                               | 15.70        | 10.50        | 3.84         |
| <b>4.</b>      | LBH-589          | 6.8                                | <300         | <300         | <300         |
| <b>5.</b>      | Belinostat       | 18                                 | -            | 46           | -            |
| <b>6.</b>      | SK-7041          | 980                                | 980          | -            | -            |
| <b>7.</b>      | SAHA             | 30                                 | 10           | 17           | 110          |
| <b>8.</b>      | Trichostatin A   | 5                                  | 18           | 2            | 25           |
| <b>9.</b>      | Oxamflatin       | 100                                | 233.1        | 233.1        | 233.1        |
| <b>10.</b>     | Pyroxamide       | 200                                | 200          | 200          | 200          |
| <b>11.</b>     | Valproic Acid    | 39000                              | 62000        | 161000       | 103000       |
| <b>12.</b>     | Scriptaid        | 200                                | 700          | 100          | 300          |
| <b>13.</b>     | Depsipeptide     | 36                                 | 1            | -            | -            |
| <b>14.</b>     | Phenyl Butyrate  | 65000                              | -            | 260000       | 9300         |
| <b>15.</b>     | Tubacin          | 1400                               | 6270         | 1270         | 1270         |
| <b>16.</b>     | Mocetinostat     | 150                                | 290          | 610          | >1000        |

**Table C** IC<sub>50</sub> (nM) values and SMILE codes for test set compounds. Test set compounds were labelled with the unique identifiers i.e. compound number- ChEMBL ID

| ID        | IC <sub>50</sub> | SMILE code                                                                                      | ID         | IC <sub>50</sub> | SMILE code                                                                             |
|-----------|------------------|-------------------------------------------------------------------------------------------------|------------|------------------|----------------------------------------------------------------------------------------|
| 1-16300   | 9-20000          | ONC(=O)Cl=CC=CC=C1                                                                              | 19-487107  | 4.2-406          | ONC(=O)CCCCCCC(=O)NC1=CC=CC(=C1)C2=CN=N <sup>N17r(r)rc3=rr/r-r-r3)r</sup>              |
| 2-55895   | 600-4000         | ONC(=O)CCCC1=CC=CC=C1                                                                           | 20-488747  | 18-433           | ONC(=O)CCCCCCC(=O)NC1=CC=CC(=C1)C2=CN=N <sup>N12</sup> CC3=CC=CC=C3                    |
| 3-138626  | 100000           | CC(=O)N(O)CCCCCCCCCC(=O)NC1=CC=CC=C1                                                            | 21-507592  | 17000-           | ONC(=O)Cl=NOC(=C1)CCCCC(=O)NC2CCCCC2                                                   |
| 4-139193  | 4000-11000       | ON(CCCCCC(=O)NC1=CC=CC=C1)C=O                                                                   | 22-511749  | 190-6000         | CC(C)(C)OC(=O)NC1=CC=C(C=C1)C2=CC(=NO2)C(=O)NCCCCCCC(=O)NO                             |
| 5-141082  | 6800-            | ON(CCCCCC(=O)NC1=CC=CC=C1)C=O                                                                   | 23-551151  | 1700             | ONC(=O)CCC1=CC=C(C=C1)C2=CC=C(O)C=C2                                                   |
| 6-146250  | 1.6-57           | C=C1\NC(=O)C(CS)NC(=O)C(NC(=O)CC(OC(=O)C(NC1=O)C(C)C(C=C)CCS)C(C)C                              | 24-564916  | 260-74000        | NC1=CC=CC=C1NC(=O)CCCCC(C2=C[NH]C3=C2=CC=C3)C4=C[NH]C5=C4C=CC=C5                       |
| 7-152162  | 2350-2720        | ONC(=O)CCC1=CC=CC=C1                                                                            | 25-1076939 | 3.0-5.9          | COC1=C(F)C=CC(=C1)[N]2C=C(N=N2)C3=CC=CC(=C3)NC(=O)CCCCCCC(=O)NO                        |
| 8-216641  | 0.8-400          | COC1=CC2=C([NH]C(=C2)C(=O)NC(CCCCCC(=O)NO)C(=O)NCCC3=C([NH]C4=C3C=CC=C4)C5=CC=CC=C5)C(=O)NCC=C1 | 26-1083439 | 53-200           | ONC(=O)CCCCCNC(=O)NC(=O)Cl=CC=CC=C1                                                    |
| 9-217651  | 55-3000          | CN1CCCCC1C(=O)NC(CCCCCC(C)=O)C(=O)NC2=NC(=CS2)C3=CC=CC=C3                                       | 27-1088734 | 28-5000          | ONC(=O)CCCCCCC(=O)NC1=CC(=CC=C1)C2=C[N](N=N2)C3=CC=C(C=C3)C(F)F                        |
| 10-236060 | 2000-20000       | NC1=CC=CC=C1NC(=O)C2=CC3=C(C=C2)N=CC=N3                                                         | 28-1093033 | 7.5-217          | CC(C)(C)Cl=C(C2CCCNC(C2)CC3=CC=C(C=C)C(=O)NO)C=C3F)C4=C([NH]1)C=CC=C4                  |
| 11-242533 | 31-50            | ONC(=O)C=C1C=CC=CC(=C1)C(=O)C2=CC3=C([NH]2)C=CC=C3                                              | 29-1093041 | 27-35            | CCCC1=CC(=CC=C1)NC(=O)CCCCC(=O)NO                                                      |
| 12-405072 | 2400-50000       | NC1=C(NC(=O)C2=CC=CC=C2)C=CC=C1                                                                 | 30-1094108 | 3100-7200        | CC1=CC=CC(=C1)C2=CC(=C(N)C=C2)NC(=O)C3=CC=C(C3)C                                       |
| 13-440018 | 1400-19000       | CN(C)Cl=CC=C(C=C1)C(=O)NCCCCCNC(=O)CS                                                           | 31-1096398 | 10000            | NC1=C(NC(=O)C2=CC=CC=C2)C=C(C=C1)C3=CC4=C(S3)C=CC=C4                                   |
| 14-466031 | 30000            | OCC1=NOC(=C1)CCCCC(=O)NC2=NC(=CS2)C3=CC=CC=C3                                                   | 32-1096982 | 11000-23000      | OC(=O)CC(C=C)C1NC(=O)C2CCCNC2(C=O)C(C=C3)C=C(C=C3)NC(=O)C(C=C4)C[NH]C5=C4C=CC=C5)NC1=O |
| 15-469134 | 30-430           | ONC(=O)Cl=NOC(=C1)CCCCC(=O)NC2=NC(=CS2)C3=CC=CC=C3                                              | 33-1097744 | 21000            | NC1=C(NC(=O)C2=CC=CC=C2)C=C(C=C1)C3=CC(=C3)[NH+]([O-])=O                               |
| 16-469275 | 83-5000          | CC(C)(C)OC(=O)NC1=CC(=CC=C1)C2=CC(=NO2)C(=O)NCCCCC(=O)NO                                        | 34-1630109 | 35-630           | ONC(=O)C=C1C1=CC(=CC=C1)C2=CC=C3N=CN=C(NC4=CC(=C(OCC5=CC(=CC=C5)F)C=C4)Cl)C3=C2        |
| 17-470843 | 127-13200        | Cl.ONC(=O)C=C1C1=CC=C(C=C1)C2=NOC(=C2)CN3COCC3                                                  | 35-1631915 | 89-382           | COC1=CC2=CC(=C1)C=C(C)OC(CCCCCC(=O)NO)C(=O)NC3=CC=CC=C3OCC2                            |
| 18-483693 | 7.9-1900         | ONC(=O)CCCCCCC(=O)NC1=CC=CC(=C1)C2=C[N](C=C3=CC=CC=C3)N=N2                                      | 36-1631916 | 204-700          | COC1=CC2=CC(=C1)CCCCC(CCCCCC(=O)NO)C(=O)NC3=CC=CC=C3OCC2                               |

Continued

| ID         | IC <sub>50</sub> | SMILE code                                                                              | ID         | IC <sub>50</sub> | SMILE code                                                                                 |
|------------|------------------|-----------------------------------------------------------------------------------------|------------|------------------|--------------------------------------------------------------------------------------------|
| 37-1722433 | 100000           | CC1=CC(=NC(=N1)SCC(=O)NCCC2=CC=CC=C2)O                                                  | 56-2170019 | 180-700          | CCC(=O)CCCCC1NC(=O)C(CCCNC(N)=N)NC(=O)CCN(CC(O)C(=O)CN(CCC2=C[NH]C3=C2C=CC=C3)C1=O         |
| 38-1767030 | 65000            | CNC(=O)C(CCCCCC(=O)NC1=CC2=CC=CC=C2C=C1)N/O                                             | 57-2323286 | 31-224           | CC(O)C1NC(=O)C1N2N=NC(=N2)C3=CSC(=N3)CNC(=O)CC(OC1=O)C=C1CCS                               |
| 39-1767033 | 10000            | CNC(=O)C(CCCCCC(=O)NC1=CC=C(C=C1)N(O)C)N/O                                              | 58-2323288 | 649-3270         | CC(O)C1NC(=O)C1N2N=NN=C2C3=CSC(=N3)CNC(=O)CC(OC1=O)C=C1CCS                                 |
| 40-1767038 | 76000            | CNC(=O)C(CCCCCC(=O)NC1=CC(=CC=C1)C2=CN=C(C2)=N/O                                        | 59-2323289 | 14000-32000      | CCCCCCCC(=O)SCC(C=C1)CC(=O)NCC2=NC(=CS2)C3=C1N(C(C(=O)NC(C(C)C(=O)O)1)N=N3)ONC(=O)C1CCCCC1 |
| 41-1767039 | 1900-69000       | CNC(=O)C(CCCCCC(=O)NC1=CC(=CC=C1)C2=CN=C(C1)C=C2)N/O                                    | 60-2333345 | 300-33000        | ONC(=O)C1CCCCC1                                                                            |
| 42-1767042 | 5100-100000      | CNC(=O)C(CCCCCCNC(=O)C1=NOC(=C1)C2=CC=C(NC(=O)OC(C)C(C)=N)O                             | 61-2347006 | 64-468           | CCC(C(=O)OC1CC(C)C=C2C=CC(O)C(CCC(O)CC(O)CC(=O)NO)C12                                      |
| 43-1800241 | 15000-23000      | CC(=O)NC1=CC=C(C=C1)C(=O)SC2=NC(=CC(=N2)C)O                                             | 62-2381517 | 120-2300         | ONC(=O)C1=CC(=CC=C1)C(=O)NCCC2=CC=CC=C2                                                    |
| 44-1800244 | 100000           | CC(=O)NC1=CC=C(C=C1)C(=O)CSC2=NC(=CC(=N2)C)C                                            | 63-2407721 | 410-12000        | NC1=CC=CC=C1NC(=O)C2=CC=C(CNC3=NC(CS3)CC4=C(C=CC=C4)C=C2                                   |
| 45-1800247 | 100000           | CC(=O)NC1=CC=C(C=C1)C(=O)COC2=CC(=CC(=N2)O)C                                            | 64-2408778 | 230-2311         | NC1=C2C(=NC=N1)N1N(C2C3=CC=C(C1)C=C3)C4=CC=CC(=C4)C5=CN=N1N15CCCCCCC(=O)NO                 |
| 46-1800248 | 100000           | CC(=O)NC1=CC=C(CSC2=NC(=CC(=N2)O)C=C1)O                                                 | 65-2414098 | 6-282            | ONC(=O)CCCCCCC1=NC2=CC=C(C(Br)C=C2[NH]1                                                    |
| 47-1800377 | 100000           | CC1=CC(=NC(=N1)SCC(=O)C2=CC3=C(O)CCO3)C=C2)O                                            | 66-2417782 | 21-2580          | CC(O)C(O)C(=O)NC1=CC=CC(=C1)C2=CSC(=N2)NC(=O)CCCCC(=O)NO                                   |
| 48-1800379 | 100000           | CC1=CC(=NC(=N1)SCC(=O)C2=CC=CC=C2)O                                                     | 67-2417783 | 5000-28000       | CC1=C(C(=O)N)CCCCCNC(=O)CS)C(=N1)C2=CC=CC=C2                                               |
| 49-1914702 | 45-780           | ONC(=O)CCCCCNC(=O)C1=NOC(=C1)C2=CC=C(NC(=O)C3=CC(=CC(=C3)N=[NH]=[N-])CN=[N+]=[N-])C=C2  | 68-2425958 | 1700-6400        | CC1=NC2=CC(=CC=C2)C(=O)N1CCC3=CC=CC=C3)C=C1C(=O)NO                                         |
| 50-1938433 | 65-1760          | ONC(=O)C=C1C1=CC2=C(O)C3(CCN(C)C3)CC4=CC=CC=C4)CC2=O)C=C1                               | 69-2431906 | 1300-50000       | C1N1C=CC=C1C(=O)N2CC3=C(C2)C=C(C=C3)C(=O)NO                                                |
| 51-2022829 | 5.2-7.6          | O=C(NC(CCCCCSSC1=CC=CC=N1)C(=O)OCC2C3=C(C=C=CC=C3)C4=C2C=CC=C4)OCC5=CC=CC=C5            | 70-2436595 | 20-1200          | CC(O)C1NC(=O)C2(C)CSC(=N2)C3=COC(=N3)CNC(=O)CC(OC1=O)C=C1CCS                               |
| 52-2048749 | 124-361          | COCl=CC=C(C=C1)[S](=O)(=O)N2C=CC3=C2C=CC(=C3)C=C(C(=O)NO                                | 71-2442698 | 140-230          | COCl=CC(=CC(=C1)O)C2C3C(COC3=O)C(NC4=CC=C(C1)O)CCCCC(=O)NO)C=C4)C5=CC=C(C(OC6)C=C5         |
| 53-2048750 | 2.3-18           | COCl=C(O)C=C(C=C1)[S](=O)(=O)N2C=CC3=C2C=CC(=C3)C=C(C(=O)NO                             | 72-2448576 | 18-10000         | CCC(=O)CCCCCNC(=O)C1CN(C)C1)C2=NC=C(NH2)C3=CC4=CC=CC=C4N=C3OC                              |
| 54-2057821 | 350-7000         | NC1=C(NC(=O)C2=CC=C(CNC(=O)O)CC3=CC(=CC(=C3)N=[N+]=[N-])CN=[N+]=[N-])C=C(C=C1)C3=CC=CS3 | 73-3098695 | 34-89            | ONC(=O)CCCCCNC(=O)C1CC(=O)N1)C(=O)NC2=CC=C(C=C2)                                           |
| 55-2057828 | 3000-1800        | NC1=C(NC(=O)C2=CC=C(COCCN=[N+]=[N-])C=C2)N=[N+]=[N-])C=C(C=C1)C3=CC=CS3                 | 74-3098697 | 1400-5000        | ONC(=O)CCCCCNC(=O)C1CCCC(=O)N1)C(=O)NC2CC=C2                                               |

**Table D** Binding energy values (kcal/mol) of training set compounds

| Inhibitors          | Binding energies |        |        |        |
|---------------------|------------------|--------|--------|--------|
|                     | HDAC1            | HDAC2  | HDAC3  | HDAC4  |
| <b>MS-275</b>       | -13.1            | -13.9  | -9.42  | -9.4   |
| <b>LBH-589</b>      | -18.5            | -29.58 | -13.55 | -20.21 |
| <b>LAQ-824</b>      | -12.48           | -30.32 | -13.2  | -17.74 |
| <b>TSA</b>          | -13.57           | -20.75 | -9.1   | -21.87 |
| <b>SAHA</b>         | -10.65           | -21.64 | -12.7  | -13.34 |
| <b>Belinostat</b>   | -22.37           | -24.83 | -16.4  | -23.92 |
| <b>Oxamflatin</b>   | -12.23           | -20.34 | -10.1  | -21.22 |
| <b>Pyroxamide</b>   | -11.52           | -21.69 | -14.6  | -14.61 |
| <b>Mocetinostat</b> | -24.15           | -21.8  | -12.23 | -      |
| <b>Scriptaid</b>    | -9.5             | -17.85 | -19.26 | -12.47 |

**Table E** Molecular descriptors of training set compounds

| Compounds           | Mol. Weight | Mol. Polarizability | Huckel Analysis ( $\pi$ energy) | Molar Refractivity | LogD | LogP  | TPSA   | HBD | HBA |
|---------------------|-------------|---------------------|---------------------------------|--------------------|------|-------|--------|-----|-----|
| <b>MS-275</b>       | 376         | 40.19               | 45.8                            | 108.288            | 2    | 2.31  | 106.34 | 4   | 7   |
| <b>LBH-589</b>      | 349         | 41.08               | 38.42                           | 105.499            | 1    | 2.39  | 77.15  | 4   | 5   |
| <b>LAQ-824</b>      | 379         | 43.6                | 42.6                            | 111.936            | 1    | 3.18  | 88.59  | 4   | 5   |
| <b>TSA</b>          | 274         | 29.44               | 30.57                           | 80.511             | 1.4  | 2.41  | 92.42  | 4   | 5   |
| <b>Saha</b>         | 264         | 28.1                | 25.62                           | 73.805             | 1.67 | 2.46  | 78.43  | 3   | 5   |
| <b>Belinostat</b>   | 318         | 32.39               | 39.69                           | 83.47              | 1.5  | 1.81  | 95.5   | 3   | 6   |
| <b>Oxamflatin</b>   | 344         | 35.82               | 42.23                           | 93.798             | 2    | 2.73  | 95.5   | 3   | 6   |
| <b>Pyroxamide</b>   | 265         | 27.23               | 26.23                           | 71.648             | 1    | 1.396 | 91.32  | 3   | 6   |
| <b>Mocetinostat</b> | 396         | 44.93               | 47.6                            | 120.316            | 2.6  | 2.93  | 105.82 | 4   | 7   |
| <b>Scriptaid</b>    | 326         | 35.05               | 35.65                           | 100.662            | 1    | -3.9  | 92.47  | 2   | 6   |

Continued

| SASA   | Vander Wall's Volume | Weiner Index (W) | Platt Index | Randic Index | Balaban Index | Harary Index | Szeged Index |
|--------|----------------------|------------------|-------------|--------------|---------------|--------------|--------------|
| 528.78 | 336.84               | 2622             | 78          | 13.61        | 1.18          | 98.96        | 3678         |
| 516.32 | 325.14               | 2128             | 74          | 12.67        | 1.27          | 89.6         | 2888         |
| 557.56 | 351.84               | 2462             | 86          | 14.53        | 1.27          | 100.51       | 3306         |
| 390.46 | 255.43               | 950              | 52          | 9.43         | 2.28          | 61.08        | 1142         |
| 422.78 | 253                  | 954              | 44          | 9.22         | 1.8           | 53.35        | 1098         |
| 413.55 | 265.6                | 1160             | 62          | 10.51        | 1.65          | 72.9         | 1622         |
| 445.67 | 292.02               | 1667             | 66          | 11.51        | 1.55          | 79.64        | 2285         |
| 416.05 | 249.8                | 954              | 44          | 9.22         | 1.8           | 53.35        | 1098         |
| 546.41 | 351.37               | 3031             | 88          | 14.69        | 1.03          | 112.36       | 4662         |
| 452.79 | 288.37               | 1432             | 72          | 11.63        | 1.42          | 85.84        | 2428         |

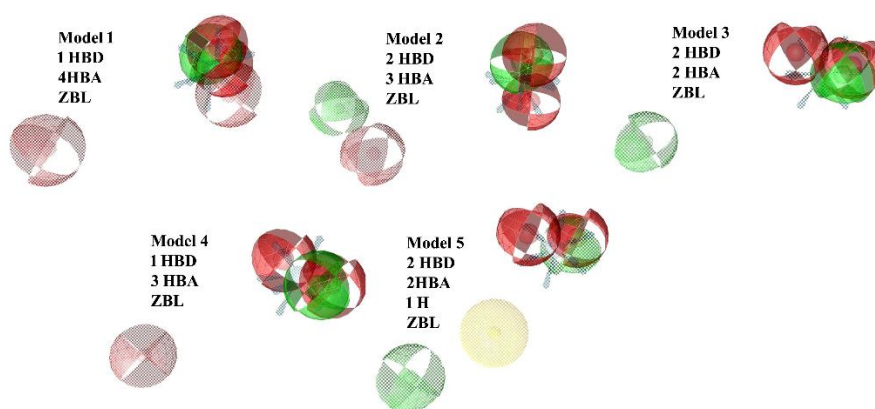

**Fig A** Top five pharmacophore models. HBD, Hydrogen Bond Donor (green); HBA, Hydrogen Bond Acceptor (red); H, Hydrophobic site (yellow); ZBL, Zinc Binding Location (blue)

**Table F** pIC<sub>50</sub> and average pIC<sub>50</sub> values of training set compounds

| Compound            | pIC <sub>50</sub> values (nm) |       |       |       | Avg. pIC <sub>50</sub> |
|---------------------|-------------------------------|-------|-------|-------|------------------------|
|                     | HDAC1                         | HDAC2 | HDAC3 | HDAC8 |                        |
| <b>MS-275</b>       | 6.92                          | 6.60  | 6.92  | ***   | 6.81                   |
| <b>LBH-589</b>      | 6.60                          | 6.60  | 6.60  | 6.60  | 6.60                   |
| <b>LAQ-824</b>      | 8.49                          | 7.80  | 7.97  | 8.41  | 8.16                   |
| <b>TSA</b>          | 8.30                          | 7.74  | 8.69  | 7.60  | 8.07                   |
| <b>SAHA</b>         | 7.46                          | 6.69  | 7     | 7     | 7.03                   |
| <b>Belinostat</b>   | 7.74                          | ***   | 7.33  | ***   | 7.53                   |
| <b>Oxamflatin</b>   | 7                             | 6.63  | 6.63  | 6.63  | 6.72                   |
| <b>Pyroxamide</b>   | 6.70                          | 6.70  | 6.70  | 6.70  | 6.70                   |
| <b>Mocetinostat</b> | 6.82                          | 6.53  | 6.21  | ***   | 6.51                   |
| <b>Scriptaid</b>    | 6.69                          | 6.15  | 7     | 6.52  | 6.58                   |

**Table G** Screening results of pharmacophore models for validation

| <b>Model No.</b> | <b>True Positive (TP)</b> | <b>False Positive (FP)</b> | <b>True Negative (TN)</b> | <b>False Negative (FN)</b> | <b>Ha (active retrieved)</b> | <b>Ht (total retrieved)</b> |
|------------------|---------------------------|----------------------------|---------------------------|----------------------------|------------------------------|-----------------------------|
| <b>Model-1</b>   | 37                        | 10                         | 21                        | 9                          | 37                           | 47                          |
| <b>Model-2</b>   | 24                        | 10                         | 20                        | 8                          | 24                           | 34                          |
| <b>Model-3</b>   | 27                        | 9                          | 21                        | 14                         | 27                           | 36                          |
| <b>Model-4</b>   | 22                        | 14                         | 16                        | 19                         | 22                           | 36                          |
| <b>Model-5</b>   | 20                        | 8                          | 22                        | 21                         | 20                           | 28                          |

Formulas for sensitivity and specificity:

$$\text{Sensitivity} = \frac{TP}{TP+FN}$$
$$\text{Specificity} = \frac{TN}{TN+FP}$$

Whereas

*TP = True Positives*

*FN = False Negative*

*TN = True Negative*

*FP = False Positive*

Formulas for %Y, E.F and G.H:

$$\%Y = \left(\frac{Ha}{Ht}\right) * 100$$
$$E.F = \frac{(Ha/Ht)}{(A/D)}$$
$$GH = \frac{\{Ha(3A+Ht)\}}{(4*Ht*A)} * 1 - \frac{(Ht-Ha)}{(D-A)}$$

Whereas

*%Y = Percent Yield*

*Ha = Total actives retrieved*

*Ht = Total hits retrieved*

*A = Total actives in dataset*

*D = Total decoys in dataset*

Formula for pIC<sub>50</sub>:

$$pIC_{50} = -\log IC_{50}(M)$$

Formula for Geometric Mean:

$$\text{Geometric Mean} = (\prod_{k=1}^n A_k)^{\frac{1}{n}} = \sqrt[n]{A_1 A_2 \dots A_n}$$

Where

*n = Total number of IC<sub>50</sub> values for each compound*

*A = Each IC<sub>50</sub> value*

ANoVA represents hypothesis testing where the null and alternate hypothesis are:

$$H_0: \beta_i = 0 \text{ for all } i, i = 1, \dots, n$$

$$H_1: \beta_i \neq 0 \text{ for atleast 1 coefficient}$$

Where

*H<sub>0</sub> = Null hypothesis*

*H<sub>1</sub> = Alternate hypothesis*

**Table H** Binding energies of 16 novel hits compounds with class 1 HDACs

| Inhibitors | Binding Energies (kcal/mol) |        |       |       |
|------------|-----------------------------|--------|-------|-------|
|            | HDAC1                       | HDAC2  | HDAC3 | HDAC8 |
| 1          | -14                         | -21.87 | -10   | -24   |
| 2          | -10                         | -16    | -6    | -9    |
| 3          | -13                         | -23.72 | -18   | -25   |
| 4          | -10                         | -22.35 | -14   | -21.8 |
| 5          | -10                         | -16    | -10   | -14   |
| 6          | -11                         | -22    | -13   | -14.7 |
| 7          | -10                         | -23.62 | -17   | -23.7 |
| 8          | -17                         | -24    | -14   | -21.4 |
| 9          | -21                         | -29.26 | -22   | -18   |
| 10         | -16                         | -23.33 | -16   | -18.3 |
| 11         | -16                         | -23    | -16   | -18   |
| 12         | -11                         | -22    | -16   | -23.1 |
| 13         | -20                         | -25.15 | -22   | -23.6 |
| 14         | -20                         | -24.56 | -21   | -26   |
| 15         | -15                         | -24    | -10   | -19.3 |
| 16         | -14                         | -25.58 | -13   | -23.8 |

**Table I** Molecular descriptors for 10 selected lead-like compounds

|     | Mol. Weight | N | Mol. Polarizability | Huckel Analysis (pi energy) | Molar Refractivity | LogD | LogP  | TPSA   | (nOHNH) | (nON) | SASA   | Vander Wall's Volume |
|-----|-------------|---|---------------------|-----------------------------|--------------------|------|-------|--------|---------|-------|--------|----------------------|
| C1  | 361.29      | 6 | 32.93               | 53.19                       | 87.88              | 2.6  | 2.56  | 87.85  | 2       | 6     | 439.11 | 287.38               |
| C2  | 385.36      | 7 | 38.46               | 50.97                       | 100.8              | 1.29 | 1.63  | 106.31 | 2       | 8     | 528.36 | 329.62               |
| C3  | 261.06      | 4 | 25.1                | 33.5                        | 65.54              | 0.2  | 0.61  | 95.69  | 2       | 6     | 335.39 | 218.52               |
| C4  | 377.29      | 5 | 32.25               | 53.54                       | 89.73              | 1.8  | 1.9   | 110    | 2       | 8     | 463.5  | 294.9                |
| C5  | 298.3       | 3 | 30.25               | 39.28                       | 101.55             | 3.4  | 1.4   | 80.15  | 2       | 6     | 379.51 | 250.87               |
| C6  | 274.7       | 3 | 27.8                | 33.77                       | 75.02              | 2.8  | 3.3   | 61.69  | 2       | 4     | 346.05 | 227.67               |
| C7  | 355.1       | 6 | 35.91               | 46.65                       | 94.34              | 1.45 | 1.7   | 97.08  | 2       | 4     | 480.67 | 303.33               |
| C8  | 360.4       | 5 | 36.8                | 43.98                       | 91.985             | 1.2  | 1.8   | 111.63 | 3       | 7     | 485.46 | 298.5                |
| C9  | 431.2       | 5 | 36.05               | 40.64                       | 92.46              | -0.2 | -0.12 | 138.67 | 4       | 9     | 475.7  | 307.86               |
| C10 | 309.3       | 4 | 32.77               | 38.09                       | 84.65              | 2.2  | 2.9   | 78.62  | 2       | 5     | 417.63 | 270.02               |

Continued

| Weiner Index (W) | Platt Index | Randic Index | Balaban Index | Harary Index | Szeged Index |
|------------------|-------------|--------------|---------------|--------------|--------------|
| 1808             | 132         | 17.72        | 1.53          | 94.77        | 2565         |
| 1651             | 76          | 11.94        | 1.33          | 89.34        | 2404         |
| 748              | 56          | 8.97         | 1.67          | 60.24        | 1268         |
| 2030             | 84          | 12.76        | 1.43          | 100.4        | 2740         |
| 1235             | 64          | 1.72         | 1.34          | 72.57        | 1930         |
| 838              | 52          | 9.15         | 1.43          | 57.32        | 1186         |
| 1847             | 78          | 12.51        | 1.5           | 94.43        | 2704         |
| 1719             | 78          | 11.88        | 1.25          | 88.67        | 2416         |
| 1710             | 76          | 11.57        | 1.62          | 87.73        | 2388         |
| 1200             | 70          | 11.06        | 1.56          | 81.88        | 2086         |

*N*= No. of rotatable bonds

*TPSA*= Topological Polar Surface Area

*nOHNH*= Hydrogen Bonds Donor

*nON*= Hydrogen Bond Acceptors

*SASA*= Solvent Accessible Surface Area

**Table J** IUPAC names and SMILE codes for compound C1-C10

| Compound | IUPAC name                                                                                             | SMILE code                                                               |
|----------|--------------------------------------------------------------------------------------------------------|--------------------------------------------------------------------------|
| C1       | 2-[[[(2Z)-2-[[2-(difluoromethoxy)phenyl]methylidene]-3-oxo-2,3-dihydro-1-benzofuran-6-yl]oxy]acetamide | <chem>NC(=O)COC1=CC=C2C(=O)\C(OC2=C1)=C\C3=C(OC(F)F)C=CC=C3</chem>       |
| C2       | (3-[[[(2Z)-6-(carbamoylmethoxy)-3-oxo-2,3-dihydro-1-benzofuran-2-ylidene]methyl]phenyl]azinic acid     | <chem>NC(=O)COC1=CC=C2C(=O)\C(OC2=C1)=C\C3=CC(=CC=C3)[NH+](O)[O-]</chem> |
| C3       | 2-[(3-acetyl-2-oxo-2H-chromen-7-yl)oxy]acetamide                                                       | <chem>CC(=O)C1=CC2=C(OC1=O)C=C(OCC(N)=O)C=C2</chem>                      |
| C4       | (1,7-dimethyl-4-oxo-3H,4H-furo[3,4-d]pyridazin-5-yl)carbamoyl methyl 3,5-difluorobenzoate              | <chem>CC1=C2C(=NNC(=O)C2=C(NC(=O)COC(=O)C3=CC(=CC(=C3)F)F)O1)C</chem>    |
| C5       | N'-[(1E)-1,4-benzodioxin-6-ylmethylidene]-3-hydroxybenzohydrazide                                      | <chem>OC1=CC=CC(=C1)C(=O)N\N=C\C2=CC3=C(O[CH2]=[CH2]O3)C=C2</chem>       |
| C6       | N'-[(1E)-(4-chlorophenyl)methylidene]-3-hydroxybenzohydrazide                                          | <chem>OC1=CC=CC(=C1)C(=O)N\N=C\C2=CC=C(Cl)C=C2</chem>                    |



|            |                                                                                                          |                                                                      |
|------------|----------------------------------------------------------------------------------------------------------|----------------------------------------------------------------------|
| <b>C7</b>  | 2-[[ <i>(2Z)</i> -2-[(3,4-dimethoxyphenyl)methylidene]-3-oxo-2,3-dihydro-1-benzofuran-6-yl]oxy]acetamide | <chem>COC1=C(OC)C=C(C=C1)\C=C2/OC3=CC(=CC=C3C2=O)OCC(N)=O</chem>     |
| <b>C8</b>  | 7-methoxy-N-[(4-sulfamoylphenyl)methyl]-1-benzofuran-2-carboxamide                                       | <chem>COC1=C2OC(=CC2=CC=C1)C(=O)NCC3=CC=C(C=C3)[S](N)(=O)=O</chem>   |
| <b>C9</b>  | 2-(5-bromo-2,4-dioxo-1,2,3,4-tetrahydropyrimidin-1-yl)-N-[1-(4-sulfamoylphenyl)ethyl]acetamide           | <chem>CC(NC(=O)CN1C=C(Br)C(=O)NC1=O)C2=CC=C(C=C2)[S](N)(=O)=O</chem> |
| <b>C10</b> | 2-[(4-methyl-2-oxo-3-phenyl-2H-chromen-6-yl)oxy]acetamide                                                | <chem>CC1=C(C(=O)OC2=C1C=C(OCC(N)=O)C=C2)C3=CC=CC=C3</chem>          |

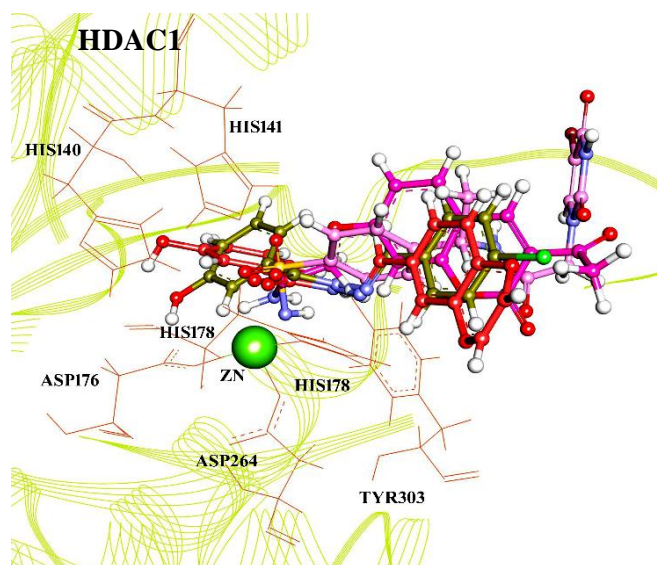

**Fig B** Binding view of selected compounds with HDAC1. A combined 3D binding view of C3, C5, C6 and C9 compounds with HDAC1. These compounds form hydrogen bonds with HIS140, HIS141, ASP176, HIS178, ASP264 and TYR303 and Zn<sup>2+</sup> of HDAC1

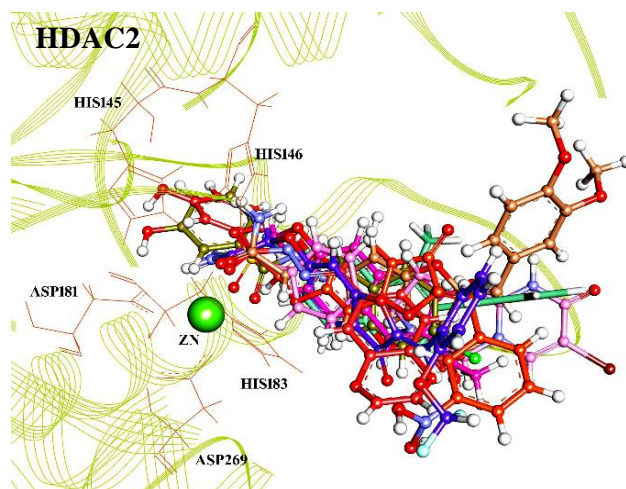

**Fig C** Combined 3D binding view of C1, C2, C3, C5, C6, C7, C9 and C10 compounds with HDAC2. These compounds formed hydrogen bonds with HIS145, HIS146, ASP181, HIS183, ASP269 and Zn+2 of HDAC2

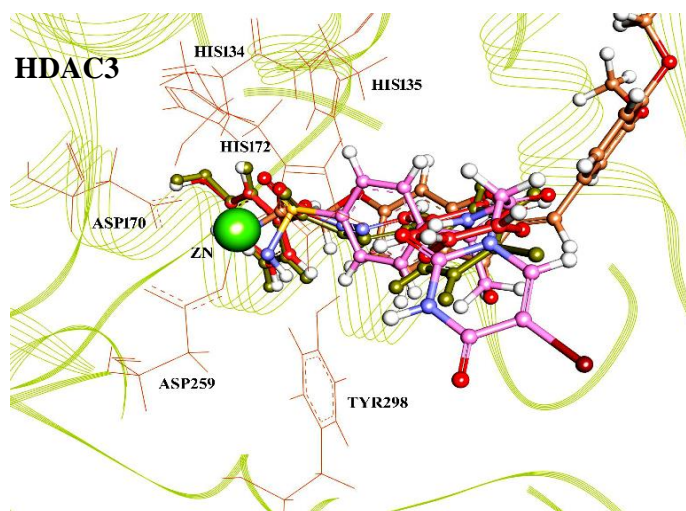

**Fig D** Binding view of selected compounds with HDAC3. Combined 3D binding view of C5, C6, C7 and C9 compounds with HDAC3. These compounds formed hydrogen bonds with HIS134, HIS135, ASP170, HIS172, ASP259, TYR298 and Zn+2 of HDAC3

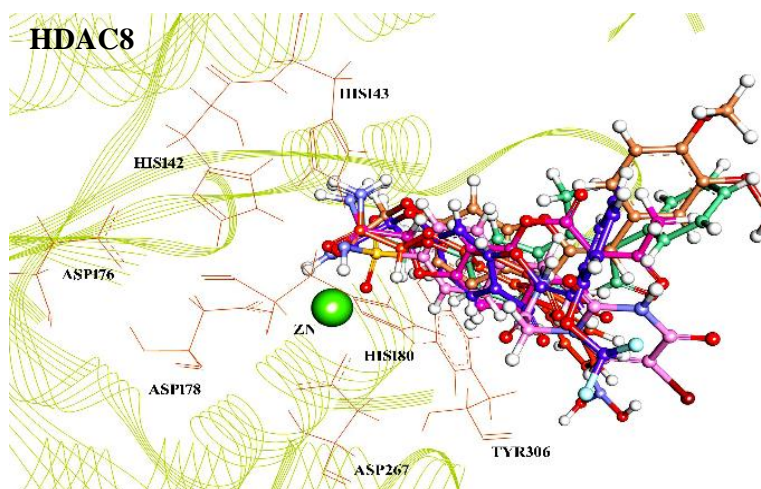

**Fig E** Binding view of selected compounds with HDAC8. Combined 3D binding view of compound C1, C2, C3, C7, C9 and C10 with HDAC8. These compounds formed hydrogen bonds with HIS142, HIS143, ASP178, HIS180, ASP267, TYR306 and Zn<sup>+2</sup> of HDAC8.

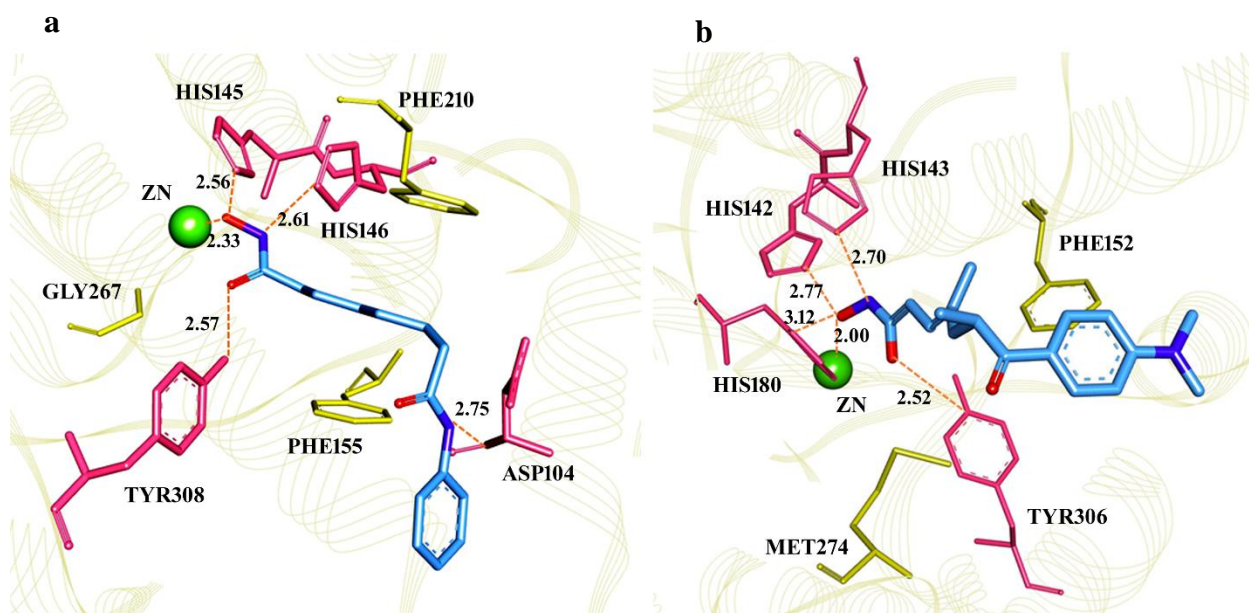

**Fig F** Experimental 3D binding view of (a) compound SAHA with HDAC2 and (b) compound Trichostatin A with HDAC8. Residues shown in pink formed hydrogen bonds with inhibitors. Hydrophobic residues and Zn<sup>+2</sup> are shown in yellow and green, respectively.

## HDAC2

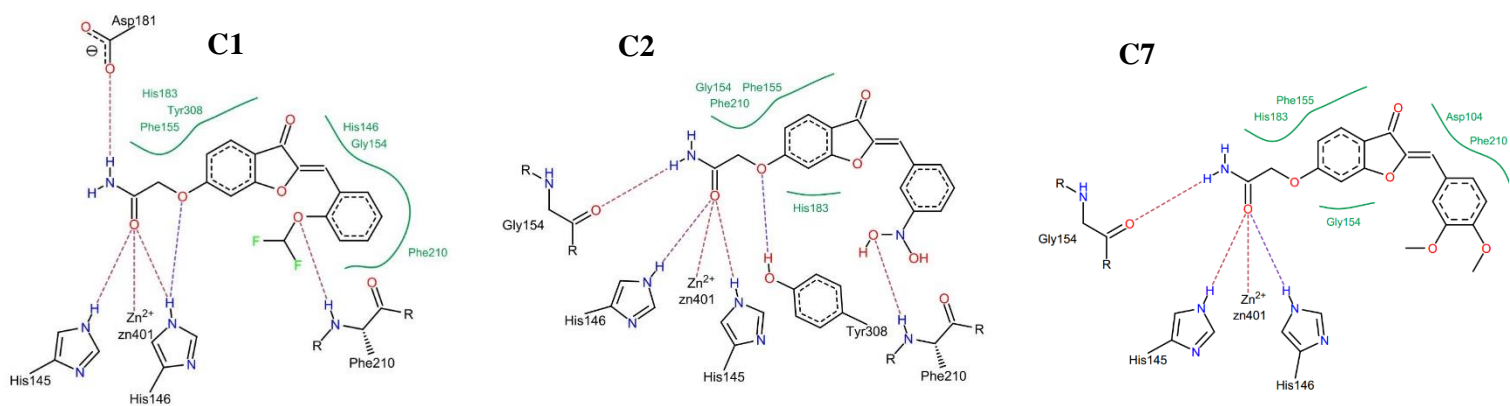

**Fig G** 2D binding view of C1, C2 and C7 with HDAC2.

## HDAC8

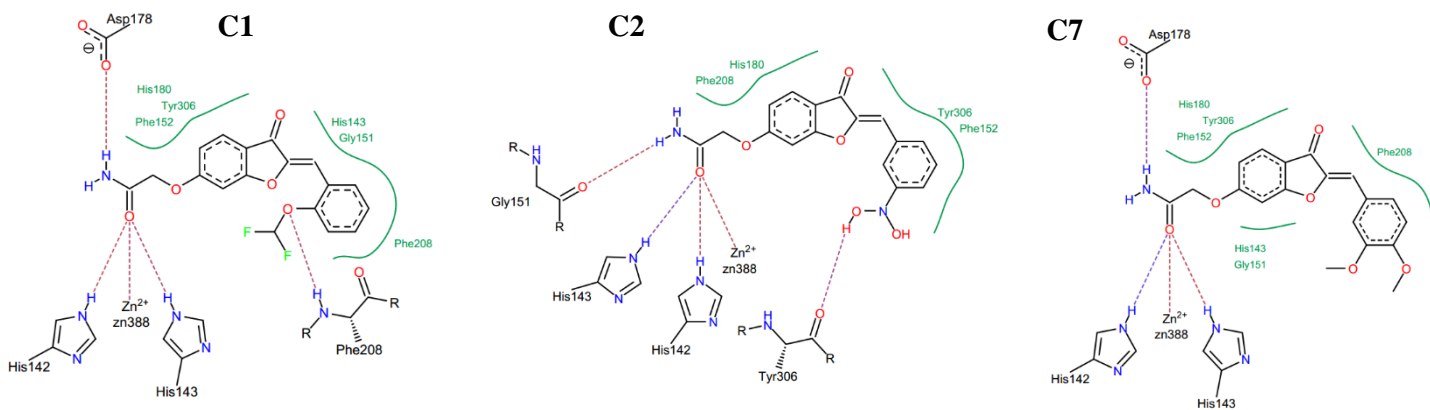

**Fig H** 2D binding view of C1, C2 and C7 with HDAC8.

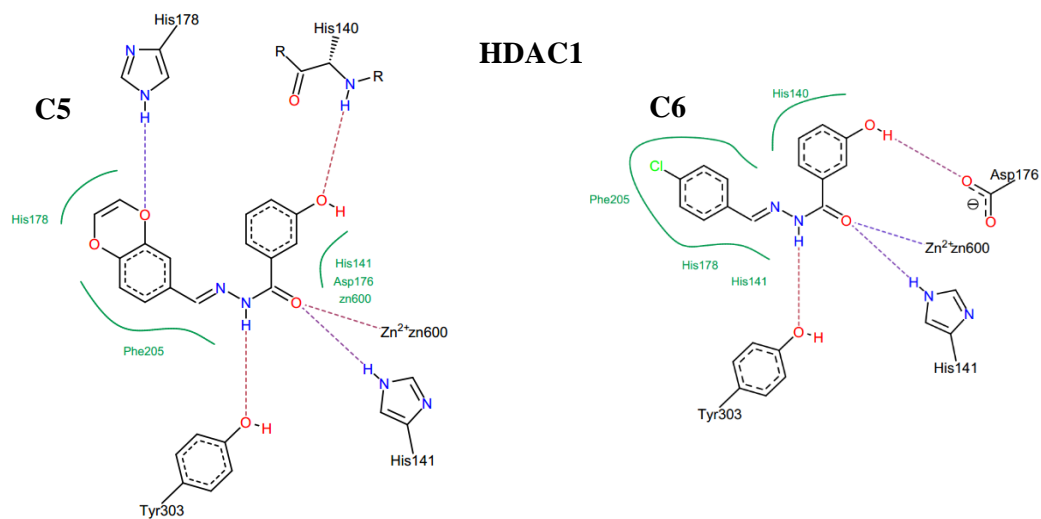

**Fig I** 2D binding view of C5 and C6 with HDAC1.

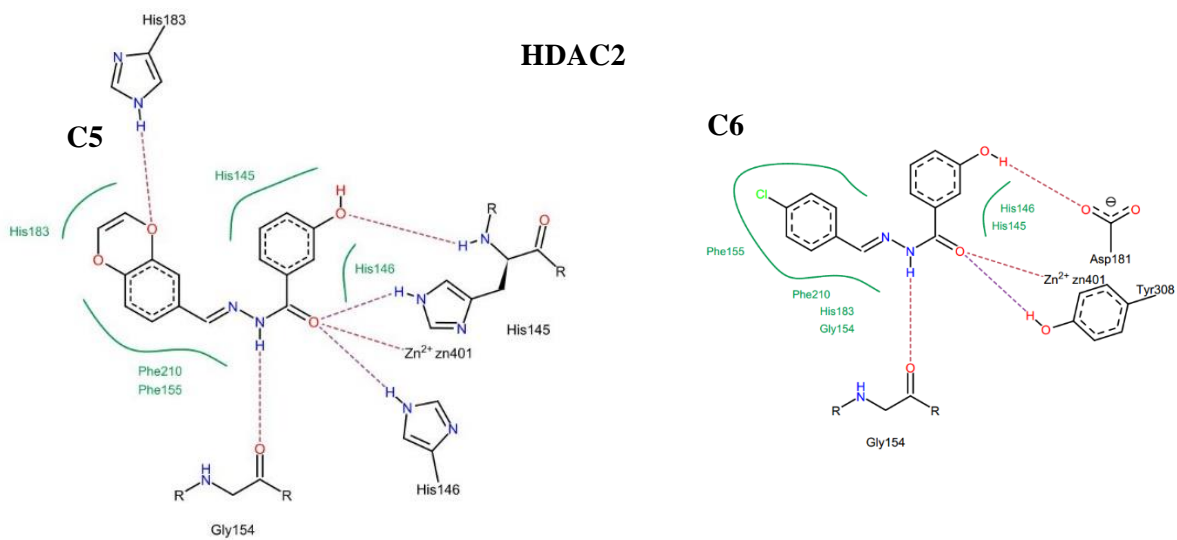

**Fig J** 2D binding view of C5 and C6 with HDAC2.

## HDAC3

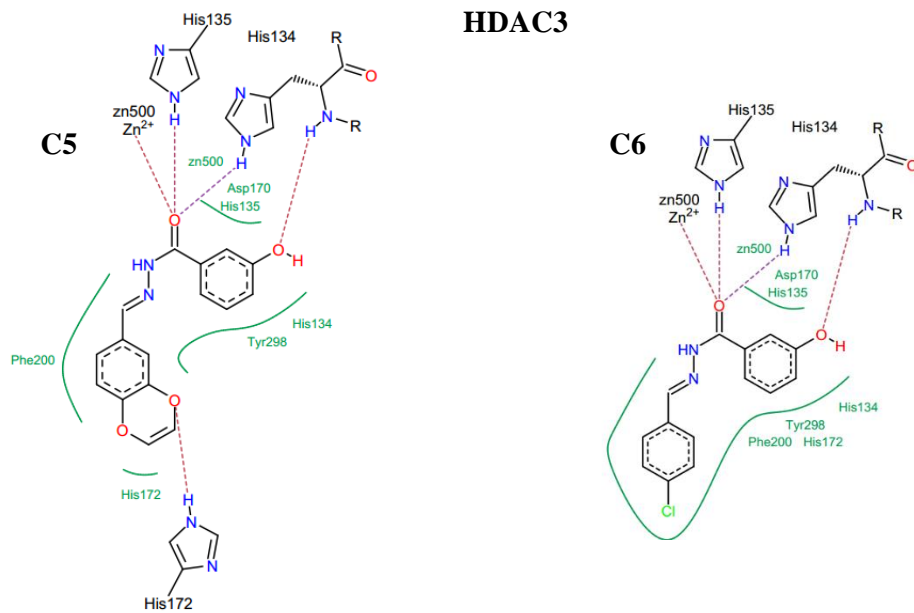

**Fig K** 2D binding view of C5 and C6 with HDAC3.
